# Supplementary material for: Overexpression of annexin A5 might guide the gemtuzumab ozogamicin treatment choice in patients with pediatric acute myeloid leukemia
Source: PubMed Central journal article supplement — Ther Adv Med Oncol. 2020 May 27;12:1758835920927635. doi: 10.1177/1758835920927635 (PMC7310896; doi:10.1177/1758835920927635), 2020-05-27
Supplement: Supplementary_Table_S1.pdf [file Supplementary_Table_S1.pdf]

**Supplementary Table S1. Comparison of clinical and molecular characteristics between the two groups of Gentuzumab ozogamicin (GO) treatment.**

| <b>Characteristic</b>                        | <b>NO-GO treatment<br/>(n=95)</b> | <b>GO treatment<br/>(n=158)</b> | <b>P-value</b> |
|----------------------------------------------|-----------------------------------|---------------------------------|----------------|
| <b>Age/years, median (range)</b>             | 10.7(0.1-23.5)                    | 10.4(0.4-22.5)                  | 0.840*         |
| <b>Age group/n (%)</b>                       |                                   |                                 | 0.709§         |
| <10 years                                    | 44(46.3)                          | 77(48.7)                        |                |
| ≥10 years                                    | 51(53.7)                          | 81(51.3)                        |                |
| <b>Gender/n (%)</b>                          |                                   |                                 | 0.303§         |
| Male                                         | 49(51.6)                          | 92(58.2)                        |                |
| Female                                       | 46(48.4)                          | 66(41.8)                        |                |
| <b>Ethnicity/n(%)</b>                        |                                   |                                 |                |
| Hispanic or Latino                           | 21(22.1)                          | 30(19)                          | 0.549§         |
| Not Hispanic or Latino                       | 68(71.6)                          | 124(78.5)                       | 0.214§         |
| Unknown                                      | 6(6.3)                            | 4(2.5)                          | 0.135§         |
| <b>WBC/×10<sup>9</sup>/L, median (range)</b> | 33.5(0.9-519)                     | 52.85(1.5-446)                  | 0.217*         |
| <b>BM blast/%, median (range)</b>            | 71(20-99)                         | 77(21-100)                      | 0.101*         |
| <b>PB blast/%, median (range)</b>            | 63(0-97)                          | 61(0-97)                        | 0.969*         |
| <b>FAB subtypes/n (%)</b>                    |                                   |                                 |                |
| M0                                           | 2(2.1)                            | 6(3.8)                          | 0.456§         |
| M1                                           | 13(13.7)                          | 19(12)                          | 0.700§         |
| M2                                           | 23(24.2)                          | 34(21.5)                        | 0.619§         |
| M4                                           | 14(14.7)                          | 43(27.2)                        | 0.021§         |
| M5                                           | 16(16.8)                          | 32(20.3)                        | 0.503§         |
| M6                                           | 1(1.1)                            | 2(1.3)                          | 0.879§         |
| M7                                           | 6(6.3)                            | 2(1.3)                          | 0.026§         |

|                              |          |           |                    |
|------------------------------|----------|-----------|--------------------|
| Others                       | 20(21.1) | 20(12.7)  | 0.076 <sup>§</sup> |
| <b>Cytogenetics/n (%)</b>    |          |           |                    |
| Normal                       | 20(21.1) | 45(28.5)  | 0.190 <sup>§</sup> |
| Complex karyotype            | 14(14.7) | 23(14.6)  | 0.969 <sup>§</sup> |
| <i>inv(16)/CBFβ-MYH11</i>    | 12(12.6) | 24(15.2)  | 0.573 <sup>§</sup> |
| <i>11q23/MLL</i>             | 18(18.9) | 23(14.6)  | 0.359 <sup>§</sup> |
| <i>t(8;21)/RUNX1-RUNX1T1</i> | 17(17.9) | 21(13.3)  | 0.321 <sup>§</sup> |
| Others                       | 14(14.7) | 22(13.9)  | 0.858 <sup>§</sup> |
| <b>Risk/n (%)</b>            |          |           |                    |
| Good                         | 39(41.1) | 64(40.5)  | 0.932 <sup>§</sup> |
| Intermediate                 | 46(48.4) | 69(43.7)  | 0.462 <sup>§</sup> |
| Poor                         | 10(10.5) | 17(10.8)  | 0.954 <sup>§</sup> |
| Others                       | 0(0)     | 8(5.1)    | 0.026 <sup>§</sup> |
| <b><i>FLT3-ITD</i>/n (%)</b> |          |           | 0.204 <sup>§</sup> |
| Positive                     | 19(20)   | 22(13.9)  |                    |
| Negative                     | 76(80)   | 136(86.1) |                    |
| <b><i>NPM1</i>/n (%)</b>     |          |           | 0.600 <sup>§</sup> |
| Mutation                     | 9(9.5)   | 12(7.6)   |                    |
| Wild type                    | 86(90.5) | 146(92.4) |                    |
| <b><i>CEBPA</i>/n (%)</b>    |          |           | 0.591 <sup>§</sup> |
| Mutation                     | 5(5.3)   | 11(7)     |                    |
| Wild type                    | 90(94.7) | 147(93)   |                    |
| <b><i>WT1</i>/n (%)</b>      |          |           | 0.733 <sup>§</sup> |
| Mutation                     | 9(9.5)   | 13(8.2)   |                    |
| Wild type                    | 86(90.5) | 145(91.8) |                    |

**c-Kit Mutation Exon 8/n (%)**

|          |          |           |                    |
|----------|----------|-----------|--------------------|
| Yes      | 6(6.3)   | 8(5.1)    | 0.673 <sup>§</sup> |
| No       | 23(24.2) | 30(19)    | 0.323 <sup>§</sup> |
| Not done | 66(69.5) | 120(75.9) | 0.258 <sup>§</sup> |

**c-Kit Mutation Exon 17/n (%)**

|          |          |           |                    |
|----------|----------|-----------|--------------------|
| Yes      | 7(7.4)   | 7(4.4)    | 0.322 <sup>§</sup> |
| No       | 22(23.2) | 31(19.6)  | 0.503 <sup>§</sup> |
| Not done | 66(69.5) | 120(75.9) | 0.258 <sup>§</sup> |

**CNS disease/n (%)**

|     |          |           |                    |
|-----|----------|-----------|--------------------|
| Yes | 3(3.2)   | 12(7.6)   | 0.148 <sup>§</sup> |
| No  | 92(96.8) | 146(92.4) |                    |

---

Abbreviations: WBC, white blood cell; BM, bone marrow; PB, peripheral blood; FAB, French American British; CNS, Central Nervous System;

‘\*’ denotes Mann-Whitney U test; ‘§’ denotes chi-square test. Complex karyotype is defined as more than or equal to 3 chromosomal abnormalities.
